# Supplementary material
Source: PubMed Central journal article supplement (PMC3885984)

## Figure Legends:

**Figure 1:** Use of antithrombotic agents, by DOPPS phase and country. APA -other than aspirin (clopidogrel, ticlopidine, dipyridamole, pentoxifylline); OAC includes warfarin (85% of total OAC) and a few other products (e.g. fluindione in France); DOPPS study period: phases 1-2 (1998-2004) and 3-4 (2005-10) with N=48,144 patients.

**Figure 2:** Variation in facility use of antithrombotic agents, by geographic region. N=20,475 patients from DOPPS phases 3 and 4 (2005-2010) in facilities with at least 7 patients with medication use records.

**Figure 3.** Rates of bleeding events and stroke by country. GI=gastrointestinal, VA=vascular access. N=39,440 patients from DOPPS phases 1,2 and 3. \*Other bleeding events include epistaxis, subdural hematoma, evacuation of hematoma, hemoptysis and hematuria. \*\*Stroke includes hospitalization or death due to stroke.

**Figure 4.** Stroke rate and bleeding rate by CHADS2 score and history of GI bleed. Stroke risk categories are based on CHADS2 categories used commonly in the non-dialysis population: 0=low, 1=moderate,  $\geq 2$ =high. N=37,657 (N=4,026 atrial fibrillation) patients from DOPPS phases 1, 2 and 3. NOTE: Patient medication usage was classified hierarchically (OAC >APA >ASA for patients taking  $\geq$ one medication class. See text for details).

**Supplemental Figure A:** Associations with bleeding, stroke, and mortality of prescription group. OAC- oral anticoagulant; APA- anti-platelet agent; ASA- acetylsalicylic acid. All models are adjusted for age, gender, race, BMI, vintage, 14 summary comorbidity classes, catheter use, deep vein thrombosis, atrial fibrillation, hemoglobin, serum albumin, serum

calcium, serum PO<sub>4</sub>, serum PTH, stratified by phase and region and accounted for facility clustering; N=39,442 patients from DOPPS phases 1, 2 and 3.

Supplemental Figure A

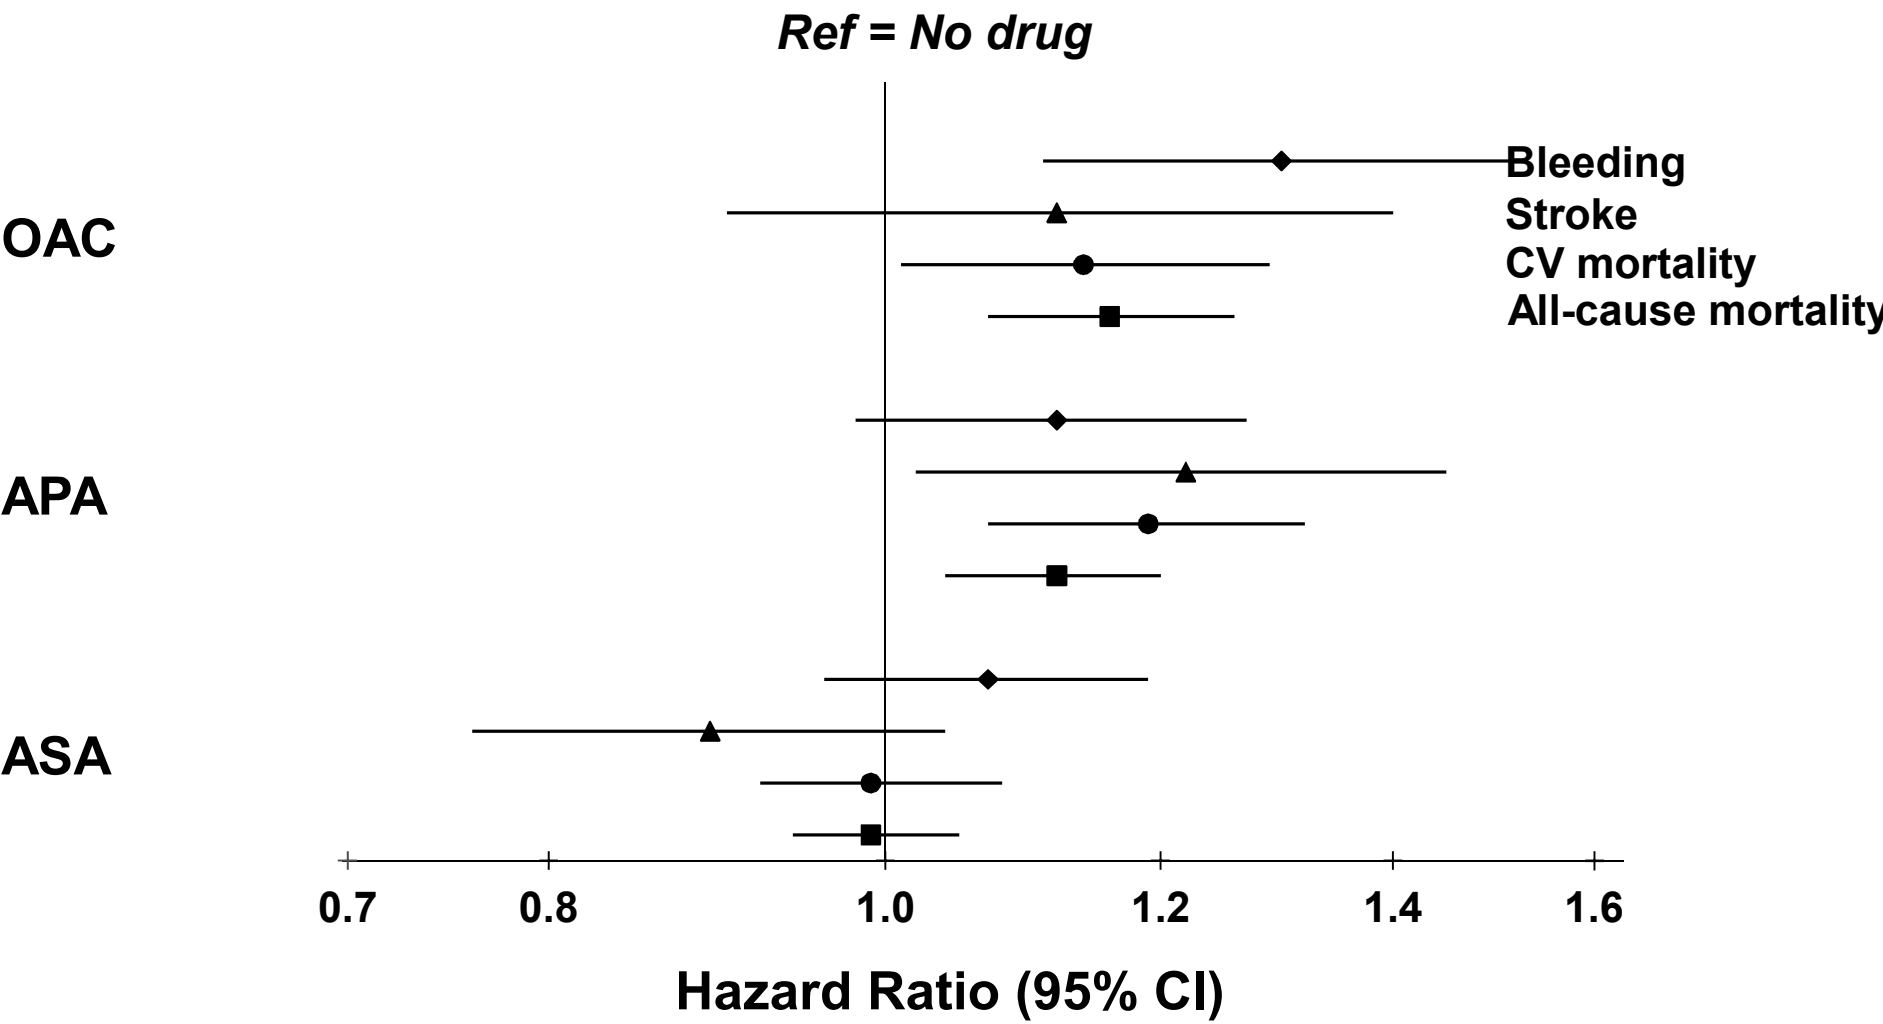

Supplement: NIHMS540534-supplement-supplement_1.pdf [file NIHMS540534-supplement-supplement_1.pdf]
